# Supplementary material
Source: PubMed Central journal article supplement (PMC3845107)
Supplement: 1306873110_pnas.201306873SI.pdf [file 1306873110_pnas.201306873SI.pdf]

# Supporting Information

Gonçalves et al. 10.1073/pnas.1306873110

## SI Materials and Methods

**Gene Expression Quantification.** mRNAs from isolated non-parenchymal cells (NPCs) were similarly purified as described in *Materials and Methods*. cDNA specific to *Bysl*, *Ccnd3*, *Frs3*, *Foxp4*, *Med20*, *Mocs1*, *Mdji*, *Nfya*, *Plcl2*, *Rftn1*, *Taf8*, *Tbc1d5*, *Tfeb*, and *Tomm6* expression was quantified using TaqMan Gene Expression Assays (Mm00479473\_m1, Mm01612362\_m1, Mm00460745\_m1, Mm00466364\_m1, Mm00498409\_m1,

Mm01273749\_m1, Mm00521984\_m1, Mm00477820\_m1, Mm01277344\_m1, Mm01281622\_m1, Mm01273585\_m1, Mm00813934\_m1, Mm00448968\_m1, and Mm00481240\_m1, respectively; Applied Biosystems). Endogenous control GAPDH (Mouse GAPD Endogenous Control; Applied Biosystems) was used in multiplex PCR reactions (Prism 7900HT; Applied Biosystems), and relative quantification was calculated using the  $\Delta\Delta C_t$  method.

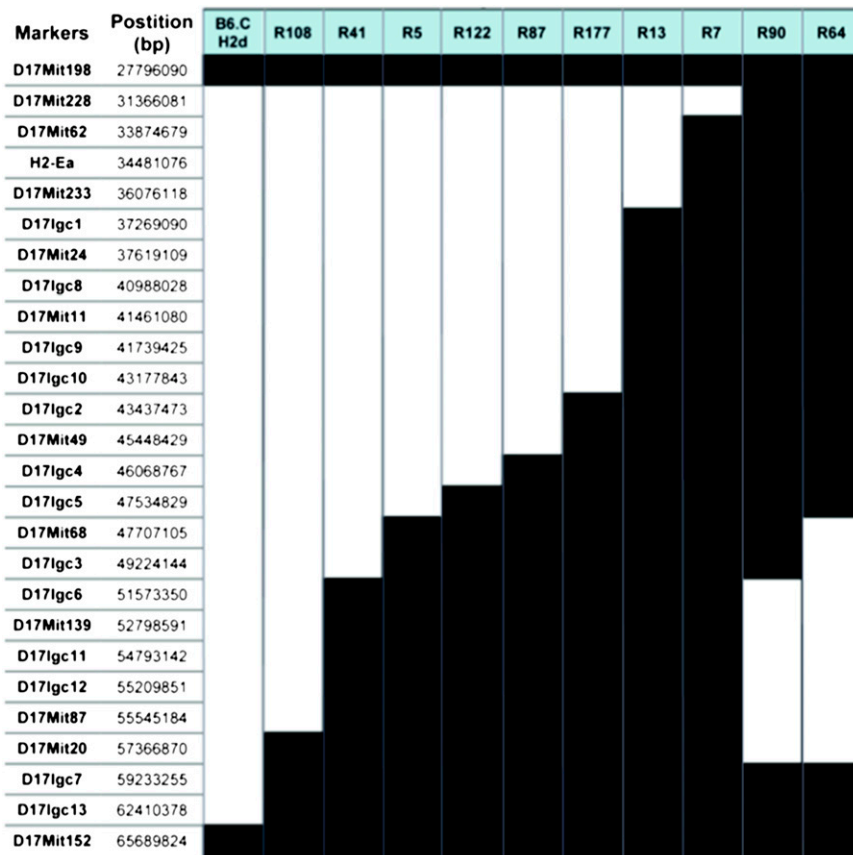

Fig. S1. Chromosome 17 genotype maps of 10 subcongenic lines selected from the B6.C-H2d  $\times$  C57BL/6 backcross progeny using 24 polymorphic microsatellites. Genotypes of BALB/c origin are in white, and those of C57BL/6 are in black.

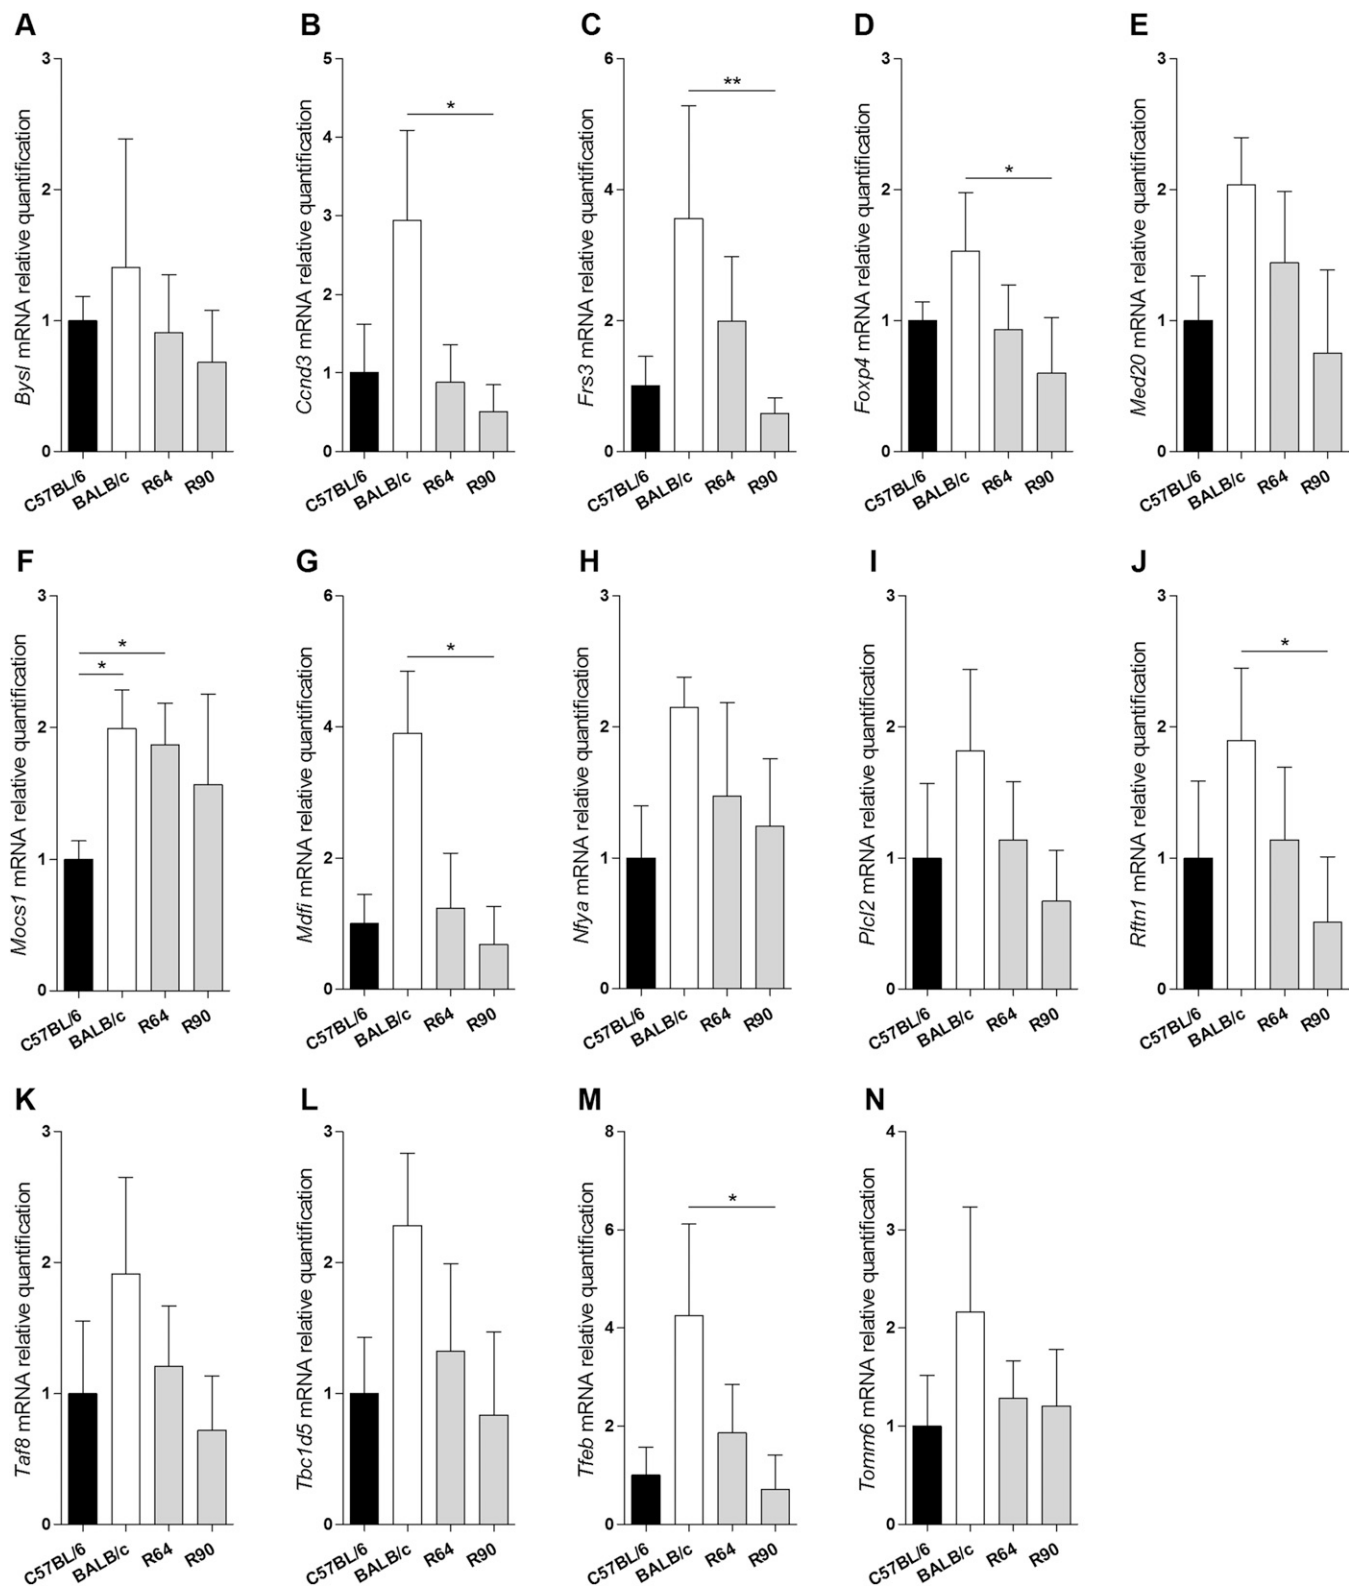

**Fig. S2.** NPC expression of non-TREM genes mapping within the *bel1* interval. mRNA of the indicated genes was quantified in NPCs isolated from non-infected R64, R90, and BALB/c mice relative to C57BL/6 mice (A, *Bysl*; B, *Ccnd3*; C, *Frs3*; D, *Foxp4*; E, *Med20*; F, *Mocs1*; G, *Mdfi*; H, *Nfya*; I, *Plcl2*; J, *Rftn1*; K, *Taf8*; L, *Tbc1d5*; M, *Tfeb*; N, *Tomm6*). Data are mean  $\pm$  SD;  $n > 6$ . \* $P < 0.05$ ; \*\* $P < 0.01$ . mRNA expression of indicated genes did not correlate with the liver stage resistance phenotype in the tested strains.

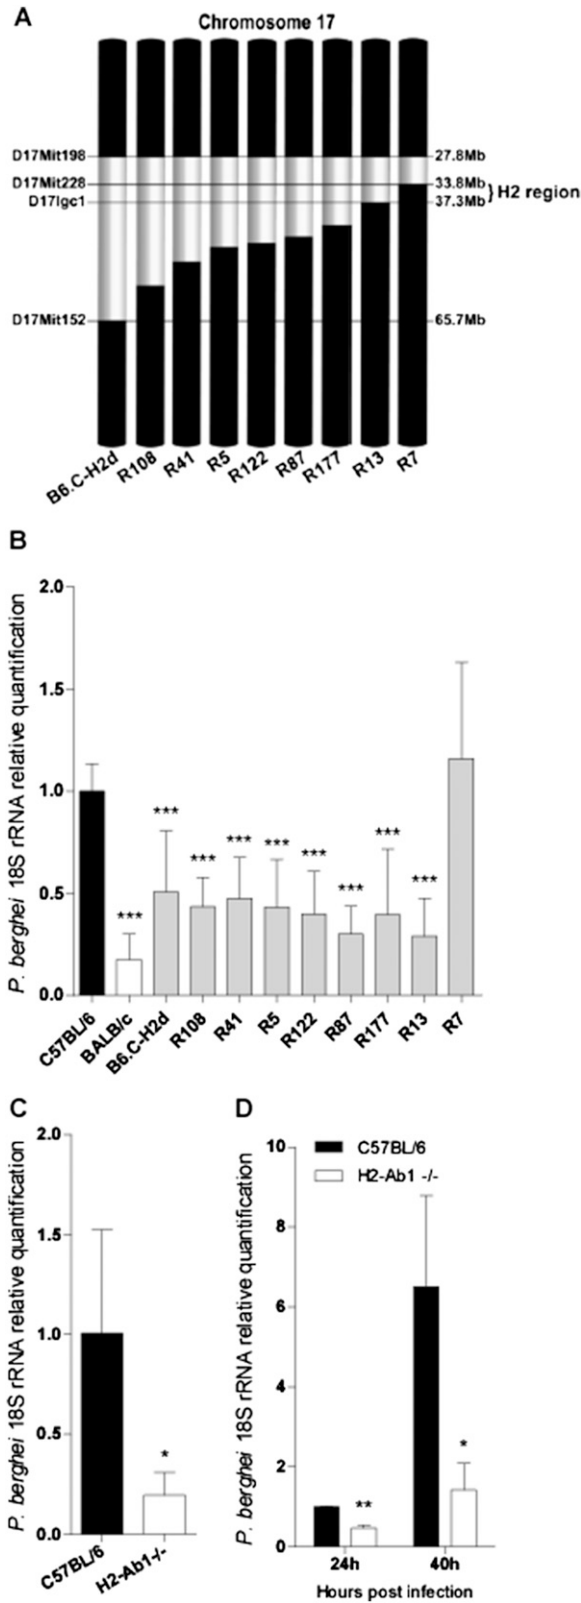

**Fig. S3.** The H2 region and class II genes contribute to malaria liver stage resistance. (A) Diagram representing the relative size of BALB/c-derived congenic regions (in white) in the B6.C-H2d strain and eight single recombinant subcongenic lines in the C57BL/6 background (in black). The R13 congenic region encompasses the H2 locus within 5.9 Mb. (B) Liver parasite burden in subcongenic lines at 40 h postinfection (p.i.) was ascertained as described in Fig. 1. Data are mean  $\pm$  SD; n = 10. (C) Liver parasite burden in *H2-Ab1*<sup>-/-</sup> mice at 40 h p.i. Data are mean  $\pm$  SD. (D) Parasite yield in infected primary cultures of *H2-Ab1*-deficient and C57BL/6 hepatocytes measured at 24 h and 40 h p.i. Data are mean  $\pm$  SD of triplicate cultures. \**P* < 0.05; \*\**P*  $\leq$  0.001; \*\*\**P* < 0.0001.

**Table S1. *belr1* gene content: Protein-coding genes encompassed in the interval D17lgc5-D17lgc6 on mouse chromosome 17**

| Gene symbol     | Gene start, bp | Gene name                                                            |
|-----------------|----------------|----------------------------------------------------------------------|
| <i>Apobec2</i>  | 48,558,556     | Apolipoprotein B mRNA editing enzyme, catalytic polypeptide 2        |
| <i>Bysl</i>     | 47,736,280     | Bystin-like                                                          |
| <i>Ccnd3</i>    | 47,642,000     | Cyclin D3                                                            |
| <i>Dazl</i>     | 50,418,719     | Deleted in azoospermia-like                                          |
| <i>Daam2</i>    | 49,595,347     | Dishevelled associated activator of morphogenesis 2                  |
| <i>Frs3</i>     | 47,825,979     | Fibroblast growth factor receptor substrate 3                        |
| <i>Foxp4</i>    | 48,004,082     | Forkhead box P4                                                      |
| <i>Guca1a</i>   | 47,531,509     | Guanylate cyclase activator 1a (retina)                              |
| <i>Kif6</i>     | 49,754,461     | Kinesin family member 6                                              |
| <i>Lrfrn2</i>   | 49,071,704     | Leucine-rich repeat and fibronectin type III domain containing 2     |
| <i>Med20</i>    | 47,748,531     | Mediator complex subunit 20                                          |
| <i>Mocs1</i>    | 49,567,687     | Molybdenum cofactor synthesis 1                                      |
| <i>Mdfi</i>     | 47,952,277     | MyoD family inhibitor                                                |
| <i>Nfya</i>     | 48,526,210     | Nuclear transcription factor-Y alpha                                 |
| <i>Plcl2</i>    | 50,648,872     | Phospholipase C-like 2                                               |
| <i>Prickle4</i> | 47,823,688     | Prickle homolog 4 ( <i>Drosophila</i> )                              |
| <i>Pgc</i>      | 47,863,791     | Progastricsin (pepsinogen C)                                         |
| <i>Rftn1</i>    | 50,131,582     | Raftlin lipid raft linker 1                                          |
| <i>Trem5</i>    | 48,262,555     | Triggering receptor expressed on myeloid cells 5                     |
| <i>Trem4</i>    | 48,288,846     | Triggering receptor expressed on myeloid cells 4                     |
| <i>Trem16</i>   | 48,455,466     | Triggering receptor expressed on myeloid cells-like 6                |
| <i>Taf8</i>     | 47,624,999     | TAF8 RNA polymerase II, TATA box binding protein-associated factor 8 |
| <i>Tbc1d5</i>   | 50,872,452     | TBC1 domain family, member 5                                         |
| <i>Tfeb</i>     | 47,873,979     | Transcription factor EB                                              |
| <i>Tomm6</i>    | 47,823,595     | Translocase of outer mitochondrial membrane 6 homolog (yeast)        |
| <i>Tspo2</i>    | 48,587,281     | Translocator protein 2                                               |
| <i>Trem1</i>    | 48,371,903     | Triggering receptor expressed on myeloid cells 1                     |
| <i>Trem2</i>    | 48,485,726     | Triggering receptor expressed on myeloid cells 2                     |
| <i>Trem3</i>    | 48,386,944     | Triggering receptor expressed on myeloid cells 3                     |
| <i>Trem11</i>   | 48,499,241     | Triggering receptor expressed on myeloid cells-like 1                |
| <i>Trem12</i>   | 48,438,864     | Triggering receptor expressed on myeloid cells-like 2                |
| <i>Trem14</i>   | 48,403,659     | Triggering receptor expressed on myeloid cells-like 4                |
| <i>Usp49</i>    | 47,767,639     | Ubiquitin specific peptidase 49                                      |
| <i>Unc5cl</i>   | 48,594,226     | Unc-5 homolog C ( <i>C. elegans</i> )-like                           |

**Table S2. *belr1* fine mapping: Polymorphic microsatellite markers**

| Marker   | Start position, bp | Fragment size* | Forward                  | Reverse                  |
|----------|--------------------|----------------|--------------------------|--------------------------|
| D17lgc1  | 37,269,090         | 132            | GGGAGTGGGAATTCCTTTATTTTA | TGCTTCTCTGTTGCTCTGAA     |
| D17lgc2  | 43,437,473         | 135            | GCTCACTTTTCCTAGCATCATC   | GCCATGGGAAGAAGTTATATGTC  |
| D17lgc3  | 49,224,144         | 146            | GATAAGTTTGGAGTCAGGCCTAA  | ACTTATCACTCCTGAGCCTTGT   |
| D17lgc4  | 46,068,767         | 158            | TAGGGCCTTTGCCTGTTTAA     | AGCTCACAAATCACCTGTAACCTT |
| D17lgc5  | 47,534,829         | 120            | TGAGATGTGAAATGGATTCCC    | TCAACCTGGGCTGTATAATGAGA  |
| D17lgc6  | 51,573,350         | 139            | ATACCCACACACAATCCAT      | GGGAAAGTATTTGGTGATCAGAGA |
| D17lgc7  | 59,233,255         | 301            | TATTTTGCCAGCCTCAAGA      | ACATGCCTATTTTTGTGGGC     |
| D17lgc8  | 40,988,028         | 134            | CCAAAGCATGTTAGAGGTAAGACA | TGAAGCCAATAAACATCCTAGGTT |
| D17lgc9  | 41,739,425         | 116            | TGTACAGTGTTTTGTGTTGTGCA  | TGAAGGTATGAACACTCAAGCAA  |
| D17lgc10 | 43,177,843         | 115            | GAATCTTGCTTTTGGCTTTGT    | GGATTGGGTGAGATTCTAAACATT |
| D17lgc11 | 54,793,142         | 137            | CTCAAAGTTTGTGGGTGTGT     | AGGGTGAATGAAATAAAGTTCCA  |
| D17lgc12 | 55,209,851         | 128            | CTAATTCTAAGCGGGTTTCTATC  | TAAAGCACAAAGGCAGGTATAGGA |
| D17lgc13 | 62,410,378         | 313            | AAGTTTGAGAGACTGGCTTCAGA  | TTCTTGGTACTTTAGGTTGGGAG  |

\*Referred to the C57BL/6 allele.
